1 **Ebselen attenuates mycobacterial virulence through inhibition of ESX-1 secretion**

2 Morwan M. Osman<sup>a,c,f</sup>, Malte L. Pinckert<sup>a,d,f</sup>, Sew Peak-Chew<sup>b</sup>, Mark A. Troll<sup>a</sup>, William H.

3 Conrad<sup>a,e,\*</sup> and Lalita Ramakrishnan<sup>a,b,\*</sup>

4

5 <sup>a</sup>Molecular Immunity Unit, Department of Medicine, University of Cambridge, MRC Laboratory  
6 of Molecular Biology, Cambridge CB2 0QH, UK.

7 <sup>b</sup>MRC Laboratory of Molecular Biology, Francis Crick Avenue, Cambridge CB2 0QH, UK

8 <sup>c</sup>Present address: York Structural Biology Laboratory, Department of Chemistry, University of  
9 York, York, YO10 5DD, UK

10 <sup>d</sup>Present address: Division of Virology, Department of Pathology, Addenbrooke's Hospital,  
11 University of Cambridge, Cambridge, CB2 0QQ, UK

12 <sup>e</sup>Present address: Department of Chemistry, Lake Forest College, Lake Forest, Illinois 60045, US

13 <sup>f</sup>M.M.O. and M.L.P. Contributed equally to this work.

14

15 \*Correspondence: William Conrad, [conrad@mx.lakeforest.edu](mailto:conrad@mx.lakeforest.edu); Lalita Ramakrishnan,

16 [lalitar@mrc-lmb@cam.ac.uk](mailto:lalitar@mrc-lmb@cam.ac.uk)

17

18 Author contributions: M.M.O., W.H.C., and L.R. designed the research; M.M.O., M.L.P., S.P.C.,

19 and W.H.C. performed research; M.M.O., M.L.P., S.P.C., M.A.T., and W.H.C. analyzed data;

20 M.M.O. and L.R. wrote the paper with input from M.L.P and W.H.C.

21 **ABSTRACT**

22                   The type VII secretion system ESX-1 mediates virulence in *Mycobacterium*  
23 *tuberculosis* and *Mycobacterium marinum*. We find that in *M. marinum*, the synthetic  
24 organoselenium compound ebselen inhibits secretion of ESAT-6, a major ESX-1 substrate. We  
25 find that ebselen inhibits the *in vitro* activity of the ESX-1 AAA+ ATPase EccA1, which  
26 potentiates ESX-1 substrate secretion and function. Ebselen modifies a cysteine in its N-terminal  
27 tetratricopeptide repeat domain that is required for EccA1's *in vitro* ATPase activity.  
28 Surprisingly, mutational analyses show this this cysteine is not required for ESX-1 secretion or  
29 ebselen's activity, showing that ebselen inhibits ESX-1 secretion independently of inhibiting  
30 EccA1 activity *in vitro*. While the mechanism by which ebselen inhibits ESX-1 secretion  
31 remains elusive, we show that it attenuates ESX-1-mediated damage of *M. marinum*-containing  
32 macrophage phagosomes and inhibits intramacrophage growth. Extending our studies to *M.*  
33 *tuberculosis*, we find that ebselen inhibits ESX-1 secretion and phagosomal membrane damage  
34 in this organism. This work provides insight into EccA1 biology. Ebselen is an orally active drug  
35 in clinical trials for other conditions and this work suggests its potential in tuberculosis therapy.

36

37

38

39

40

## 41 INTRODUCTION

42 *Mycobacterium tuberculosis* (Mtb) and its close genetic relative *Mycobacterium marinum*  
43 (Mm) require their type VII secretion system ESX-1 (ESAT-6 Secretion System 1) for  
44 virulence[1–3]. ESX-1 was first identified as a virulence determinant when it was shown that a  
45 9.4 kb deletion ( $\Delta$ RD1) in its locus was the primary cause of attenuation for the live attenuated  
46 vaccine BCG [1,3–6]. ESX-1 mediates membranolytic activity reflected by damage to the  
47 membranes of mycobacterium-containing macrophage phagosomes[7,8]. This damage is thought  
48 integral to ESX-1 mediated virulence functions such as intramacrophage growth[9]. *In vitro*,  
49 ESX-1 mediates membrane disruption of infected lung epithelial cells [10], cultured  
50 macrophages [10], and red blood cells (RBCs) [11–13]. Previously, ESX-1 membranolytic  
51 activity had been ascribed to its secreted substrate ESAT-6 forming pores in host  
52 membranes[10,12,14]. In 2017, we found that the pore-forming activity ascribed to ESAT-6 was  
53 due to residual detergent contamination of ESAT-6 preparations[15]. Moreover, we found that  
54 ESX-1 membrane disruption was exclusively contact-dependent and caused gross membrane  
55 disruptions as opposed to distinct pores [15].

56 In this paper, we report studies that were instigated by our speculation that ESX-1 might  
57 mediate membrane disruptions through peroxidation of host membrane lipids. Following this  
58 hypothesis, we identified the antioxidant drug ebselen (2-phenyl-1,2-benzisoselenazol-3(2H)-  
59 one) as an inhibitor of *M. marinum* (Mm) ESX-1's hemolytic function. We determined that  
60 ebselen inhibition of ESX-1 substrates, including ESAT-6. In searching for the relevant target of  
61 ebselen, we investigated the ESX-1 ATPase EccA1, and found that it specifically inhibited its *in*  
62 *vitro* ATPase activity through covalent binding to a cysteine in its proposed substrate binding  
63 domain. However, ebselen's effect on ESX-1 secretion in Mm was not due to EccA1 inhibition.

64 Finally, we showed that ebselen inhibits ESX-1 function within infected macrophages, with  
65 treatment inhibiting phagosomal damage and intramacrophage growth. Finally, we found that  
66 ebselen also inhibits ESAT-6 secretion and phagosomal damage in Mtb, suggesting its potential  
67 as an adjunctive treatment for tuberculosis.

## 68 **RESULTS**

### 69 **Ebselen inhibits ESX-1 secretion in *Mm***

70 To test the hypothesis that ESX-1-dependent membrane disruptions could occur through  
71 peroxidation of host lipids, we screened antioxidants for their ability to inhibit Mm's contact-  
72 dependent hemolytic activity. We tested the antioxidants ebselen, ascorbate, and butylated  
73 hydroxytoluene, and only ebselen inhibited Mm's RBC lysis with a half maximal inhibitory  
74 concentration (IC<sub>50</sub>) of 9.3 μM (Fig. 1A). These findings indicated that ebselen's effects on RBC  
75 lysis was independent of its antioxidant effect, suggesting that lipid peroxidation was not the  
76 mechanism behind ESX-1 membrane disruption.

77 We pursued how ebselen might inhibit hemolysis independent of its antioxidant effect.  
78 As ebselen has been reported to have antimicrobial activities against Mtb [16], we set to  
79 determine if bacterial killing was responsible for ebselen's effect on Mm's hemolytic activity.  
80 We plated Mm that had been exposed to ebselen for the duration of the hemolysis assay and  
81 found that even the highest concentration used, 62.5 μM, did not affect viability (Fig. 1A and  
82 1B). Ebselen's drug-like activities are mediated through its selenium moiety, which enables it to  
83 covalently modify free thiols, such as free cysteine residues [17,18]. Consistent with this, we  
84 found that an ebselen analog lacking the selenium moiety, 2-(2,6-dimethylphenyl)-1-  
85 isoindolinone (DIME) failed to inhibit hemolysis (Fig. 1C and D). We next asked if ebselen's  
86 primary action was on ESX-1 secretion, assessing the secretion of two co-secreted substrates,



87 ESAT-6 and CFP-10, as a proxy for overall ESX-1 secretion. Ebselen treatment inhibited both  
88 ESAT-6 and CFP-10 secretion, while DIME had no effect (Fig. 1E). Altogether, these results  
89 show that ebselen inhibits ESX-1 secretion likely by cysteine modification.

90

### 91 **Ebselen inhibits EccA1's *in vitro* ATPase activity**

92 Ebselen has been shown to inhibit the activity of prokaryotic and eukaryotic enzymes,  
93 including the yeast plasma membrane H<sup>+</sup>-ATPase [19]. These inhibitory functions occur through  
94 ebselen's reactivity with free thiols, including free cysteine residues [18]. ESX-1-mediated  
95 secretion is dependent on two ATPases within the locus: the FtsK/SpoIIIE ATPase EccC1,  
96 encoded by the adjacent genes EccCa1 and EccCb1, which powers the transport of ESX-1  
97 substrates[20–22], and the AAA+ ATPase EccA1, which is thought to act as a chaperone for  
98 ESX-1 substrates [21,23,24]. The ATPase activity of purified Mtb EccA1 protein has been  
99 demonstrated [25]. We attempted to purify both EccA1 and EccC1 (as an EccCa1/Cb1 fusion)  
100 and only succeeded in purifying EccA1. We found that ebselen inhibited the ATPase activity of  
101 purified EccA1 in a dose-dependent manner, with an IC<sub>50</sub> of 2.5 μM (Fig. 2A). To determine if  
102 this inhibition was via cysteine modification, mass spectrometry analyses were performed on the  
103 samples treated with the various ebselen concentrations in Fig. 2A. We identified ebselen-  
104 modified peptides corresponding to cysteines 204 and 531 (Figure 2B, S1).

105 In addition to the ATPase domain that mediates EccA1's assembly and enzymatic  
106 activity [25], EccA1 has a large N-terminal tetratricopeptide repeat (TPR) domain predicted to  
107 mediate substrate binding [26] and is dispensable for its *in vitro* ATPase activity[25]. Of the two  
108 residues modified by ebselen, only Cys204 is present in Mm (Figure S2), and we found that  
109 ebselen's binding to Cys204 was also linked to inhibition of activity, suggesting that

110 conservation of the TPR domain is required for EccA1's ATPase activity. This was supported by  
111 the MS data indicated that ebselen modification of Cys204 preceded that of Cys531 (Figure 2B,  
112 S1).

113 Examination of the crystal structure of EccA1's TPR domain (PDB: 4F3V) revealed that  
114 Cys204 is located in the TPR domain's hydrophobic core (Fig. 2C) [26]. To confirm Cys204's  
115 role in ebselen's activity, we engineered EccA1 where the Cys204 had been changed to a valine  
116 (EccA1 C204V) or to the more hydrophilic residue serine (EccA1 C204S). We saw that EccA1  
117 C204V had similar ATPase activity to the wildtype enzyme, while EccA1 C204S showed only  
118 14% of wildtype EccA1 (Figure 2D,E). These findings suggested that while Cys204 is  
119 dispensable for enzymatic activity, conservation of its hydrophobic environment is essential for  
120 EccA1's *in vitro* ATPase function.

121 If ebselen's ATPase inhibitory activity was primarily due to modification of Cys204, then  
122 EccA1 C204V should not be inhibited by ebselen treatment. When we treated both wildtype and  
123 EccA1 C204V with 8  $\mu$ M ebselen, we found that EccA1 Cys204 was essential for ebselen  
124 inhibition: with EccA1 C204V retaining 95% of its ATPase activity vs ~60% for WT EccA1  
125 (Figure 2F). We expected to see an intermediate level of inhibition, as we identified Cys531  
126 modified peptides in wildtype EccA1 treated with 8  $\mu$ M ebselen. Instead, EccA1 C204V's  
127 insensitivity indicates that Cys204 modification must either precede Cys531 modification or that  
128 Cys531 modification does not contribute substantially to ebselen's inhibitory effect. Together,  
129 these results show EccA1 Cys204 is essential for ebselen's *in vitro* inhibition of EccA1 ATPase  
130 activity.

131

### 132 **Ebselen's effect on ESX-1 secretion is independent of EccA1**

133 We next asked whether the loss of *in vitro* ATPase activity was the mechanism for ebselen's  
134 inhibition of ESX-1 secretion. We generated an unmarked Mm- $\Delta eccA1$  mutant by excising the  
135 hygromycin cassette from an Mm-*eccA1*::Tn mutant, and confirmed it was still deficient in  
136 secretion of ESAT-6 and CFP-10 (Figure 3A). We then complemented Mm- $\Delta eccA1$  with the  
137 plasmids pMOFXh-*eccA1*<sub>Mtb</sub> and pMOFXh-*eccA1*<sub>Mtb</sub>-C204V, which express Mtb EccA1 and  
138 EccA1-C204V respectively. Mm-::EccA1<sub>Mtb</sub> and Mm-::C204V both restored secretion of ESAT-  
139 6 (Fig 3B). If ebselen's ESX-1 inhibitory effects are mediated through EccA1, then Mm  
140 expressing EccA1-C204V should secrete ESAT-6 in the presence of ebselen. To our surprise, we  
141 found that ebselen treatment inhibited ESAT-6 secretion similarly in Mm- $\Delta eccA1$ ::C204V as in  
142 wildtype Mm and Mm- $\Delta eccA1$ ::EccA1<sub>Mtb</sub>. Thus, ebselen's effects on ESX-1 secretion were not  
143 through inhibition of EccA1. Furthermore, complementation Mm- $\Delta eccA1$  with EccA1-C204S  
144 rescued secretion, demonstrating that the *in vitro* ATPase defects we observed were not  
145 sufficient to abrogate EccA1's role in ESX-1 function.

146

### 147 **Ebselen inhibits ESX-1-mediated virulence phenotypes in Mm-infected macrophages**

148 Our inability to find ebselen's target notwithstanding, its inhibitory effects on ESX-1  
149 secretion suggested it could be a promising antitubercular drug. We asked if ebselen treatment of  
150 Mm infected macrophages would inhibit ESX-1 virulence-associated functions in infected  
151 macrophages. We tested its effects on phagosomal damage of mycobacterial compartments,  
152 thought to be primary to ESX-1-dependent intramacrophage growth[9]. We used the galectin 8  
153 assay to determine whether ebselen treatment affected the extent to which Mm could damage its

154 resident compartment within the macrophage. Galectin 8 is recruited to sites of membrane  
155 damage and is a sensitive measure of phagosomal damage in Mm- and Mtb-infected  
156 macrophages[27,28]. We found that treatment with 16  $\mu$ M ebselen significantly reduced the  
157 amount of phagosomal damage induced by wild-type Mm (Fig 4A), demonstrating that ebselen  
158 effectively inhibits Mm ESX-1 in the context of the infected macrophage. Moreover, ebselen  
159 also inhibited intramacrophage growth (Figure 4B). However, this reduction, though significant,  
160 was partial, being much less than that of the Mm- $\Delta$ RD1 strain (45% vs. 92% reduction over 3  
161 days) , and moreover, there was no significant difference in growth for concentrations ranging  
162 from 16 to 64  $\mu$ M, showing that we had identified its maximal effect in this assay (Fig 4B).

163

#### 164 **Ebselen inhibits Mtb ESX-1 function**

165 We have previously shown that *Mm* and *Mtb* ESX-1 are functionally equivalent, with the  
166 *Mtb* ESX-1 locus capable of complementing an ESX-1-deficient Mm RD1 deletion (Mm- $\Delta$ RD1)  
167 mutant's defects in hemolysis, secretion, and virulence [15]. To determine if ebselen inhibited  
168 ESX-1 secretion in *Mtb*, we used the *Mtb* H37Rv derivative mc<sup>2</sup>6206, which is auxotrophic for  
169 leucine and pantothenic acid but retains an intact ESX-1 locus [29]. The mean inhibitory  
170 concentration (MIC) of ebselen has been measured to be significantly lower in *Mtb*, with values  
171 ranging from 36.4 to 76.4  $\mu$ M depending on strain [30,31] versus 100  $\mu$ M for *Mm*, we selected  
172 doses of 8 and 16  $\mu$ M to ensure any effects we were seeing were not due to the microbicidal  
173 activity of ebselen. We found that at both doses, ebselen treatment reduced ESAT-6 secretion  
174 (Fig 5A). We then set out to determine whether these doses were capable of inhibiting *Mtb*'s  
175 function during macrophage infection. We turned to the galectin 8 assay to measure the extent  
176 that ebselen treatment could inhibit ESX-1 function within the macrophage. We found that *Mtb*,

177 both doses significantly reduced the frequency of phagosomal damage by Mtb, with 16  $\mu$ M  
178 showing a greater reduction than 8  $\mu$ M (28.4% vs 36.5% of infected cells with puncta) (Figure  
179 5B). Together, these results demonstrate that ebselen effectively inhibits the ESX-1 function of  
180 Mtb.

## 181 **Discussion**

182 This work identifies ebselen, a drug in clinical trials for many different medical  
183 conditions (NCT:04677972, 02819856,03013400, 05117710), as a potential adjunctive treatment  
184 for TB. We showed that ebselen works by inhibiting ESX-1 secretion and function. Because the  
185 ESX-1 secretion system is a critical virulence determinant, there has been a systematic study to  
186 screen FDA-approved drugs that inhibit Mtb ESX-1 secretion [32]. This screen found that  
187 ethoxzolamide (ETZ), an FDA- approved drug, inhibits ESX-1 secretion via suppression of  
188 PhoPR signaling [32]. However, we have found that PhoPR does not regulate ESAT-6 secretion  
189 in Mm as it does in Mtb (F. Chu, C. Cosma and LR, unpublished data). Because ebselen inhibits  
190 ESX-1 secretion in both Mm and Mtb, we can deduce its mechanism is distinct from ETZ's.  
191 Rybniker et. al. identified ESX-1 inhibitors that operate through different mechanisms: BTP15  
192 and BBH7. BTP15 which inhibits the MprB histidine kinase which regulates the ESX-1 *espACD*  
193 operon, while BBH7 disrupts mycobacterial metal homeostasis, resulting in dysregulation of  
194 ESX-1 secretion [33]. Our discovery of ebselen, in contrast, was serendipitous, resulting from  
195 searching for the mechanism of mycobacterial ESX-1-mediated membrane disruption. Moreover,  
196 despite our efforts, we have not yet identified ebselen's target. Our initial data suggesting ESX-1  
197 AAA+ ATPase EccA1 as its target turned out to be a false lead. However, this finding did shed  
198 light on EccA1 biology and suggests that either its residual activity with ebselen treatment  
199 (~14%) is sufficient for secretion, and/or that its activity, like that of other AAA+ ATPases, is

200 induced by specific *in vivo* substrates missing in our *in vitro* biochemical activity assay[34].  
201 Despite not knowing its target, our finding that this safe, well-tolerated drug[35,36] can work as  
202 an anti-virulence drug in TB is potentially important. Ebselen has promiscuous activity, reacting  
203 with any free sulfhydryl group and therefore can inhibit multiple human enzymes including  
204 inositol monophosphatase [37] and indoleamine 2,3-dioxygenase [38]. This may explain its  
205 promise in multiple conditions ranging from Meniere's disease, drug-induced ototoxicity, bipolar  
206 disorder and treatment-resistant depression (NCT: 04677972, 02819856, 03013400, 05117710).

207 Ebselen has been demonstrated to show antimicrobial activity in *Helicobacter pylori* and *Mtb*  
208 [39]. Its antimicrobial effects on *Mtb* have been attributed to covalent modification of the  
209 essential Antigen 85 complex (Ag85C) [30]. Ag85C synthesizes the lipid trehalose dimycolate  
210 (TDM) from trehalose monomycolate, and ebselen treatment abrogates this activity [30].  
211 However, ebselen's inhibition of *Mtb* TDM synthesis is observed only at concentrations at or  
212 above 73  $\mu\text{M}$  [30], whereas we observed inhibition of *Mtb* ESX-1 secretion at 8  $\mu\text{M}$   
213 concentrations. Thus, its inhibition of ESX-1 secretion is distinct from its inhibition of Ag85C.

214 Ebselen has been demonstrated to be clinically safe and well tolerated in humans [35],  
215 suggesting its potential to standard anti-tuberculous chemotherapy. In Meniere's disease which  
216 can be associated with hearing loss, a recently completed phase 2B trial found that ebselen  
217 achieved pre-specified end points in improving this hearing loss relative placebo  
218 (NCT:04677972). Ebselen has been shown to be otoprotective against aminoglycoside-induced  
219 ototoxicity in mice through its antioxidant activity[40]. This finding is being followed up in an  
220 ongoing clinical trial to see if it prevents aminoglycoside-induced ototoxicity in cystic fibrosis  
221 patients (NCT: 02819856). Aminoglycoside-induced ototoxicity is difficult to predict and  
222 presents a challenge in completing aminoglycosides-containing regimens, the mainstay of drug-

223 resistant TB treatment [41]. Our findings that it may suggests its otoprotective, antimicrobial,  
224 and anti-virulence properties may combine to make it particularly attractive in aminoglycoside  
225 containing tuberculosis treatment regimens.

## 226 **Materials and Methods**

227 **Bacterial strains and methods** Strains used are listed in Supplementary Table 2. All Mm strains  
228 were derived from wild-type Mm purchased from American Type Culture Collection (strain M,  
229 ATCC #BAA-535). Wildtype Mm was maintained as described previously[15]. Mm-*eccA1*::Tn  
230 was pulled from an Mm transposon mutant library (C. L. Cosma, L.R., unpublished data). Mm-  
231  $\Delta$ *eccA1* was generated by excision of the mariner-transposon via transformation with pYUB870.  
232 Loss of pYUB870 was confirmed by plating on 7H10+sucrose plates, and loss of the transposon  
233 was confirmed via PCR and loss of growth on selective media. *M. tuberculosis* mc<sup>2</sup>6206 was  
234 cultured in 7H9 complete media containing 0.05% tween 80 supplemented with pantothenic acid  
235 (12 µg/mL) and leucine (25 µg/mL).

236 **Hemolysis assay** Hemolytic activity was assessed as described previously[15]. Briefly, 100 µL  
237 of sheep red blood cells (sRBCs) were transferred to each condition and 100 µL of PBS or  
238 bacterial suspension were added on top and incubated for two hours at 33°C. 100% lysis with  
239 0.1% Tx100 (Sigma). Drugs stocks were made at 200x concentrations and 0.5% DMSO was  
240 used as a vehicle control.

241 **Secretion Assays** Secretion assays were conducted as described previously with minor  
242 modifications [15]. Briefly, Mtb mc<sup>2</sup>6206 and Mm were grown to mid to late log stage and  
243 washed with PBS before being resuspended to a final OD<sub>600</sub> of 0.8. *M. tuberculosis* mc<sup>2</sup>6206 was  
244 resuspended in 50 mL 7H9 media supplemented with 10% DC (2% dextrose, 145 mM NaCl, 30  
245 µg/mL bovine catalase), pantothenic acid, (12 µg/mL) and leucine (25 µg/mL). Cultures were

246 incubated for 4 days at 37°C in the presence of drug or 0.5% DMSO. Mm was resuspended in 50  
247 mL Sauton's Media and incubated for 4 hours at 33°C in the presence of drug or 0.5% DMSO.  
248 Culture filtrate (CF) and cell pellet (CP) fractions were prepared as described previously [15]. 10  
249 µg of CP and 30 µg of CF were loaded per well for SDS-PAGE, and presence of ESAT-6, CFP-  
250 10 and GroEL2 were determined by western blotting with mouse anti-ESAT-6 clone 11G4  
251 (1:1,000; Thermo Fisher, HYB-076-08-02), rabbit anti-CFP-10 (1:500; BEI, product NR13801),  
252 or mouse anti-GroEL2 clone IT-56 (1:1,000; BEI, product NR-13655).

253

254 **Purification of EccA1** Purification constructs were expressed in *E. coli* C43 (DE3) (Lucigen).  
255 Single colonies were used to inoculate 100 mL of Lysogeny Broth (LB) media containing 50  
256 µg/mL Kanamycin and incubated overnight (O/N) at 37°C. 1L of Terrific Broth (TB) was  
257 inoculated at an OD<sub>600</sub> of 0.015 and grown at 37°C to an OD<sub>600</sub> between 0.6-0.8 and cooled to  
258 20°C and induced with 1 mM IPTG O/N. Pelleted cells were resuspended in ice-cold Lysis  
259 Buffer (2.5xPBS; 10 mM Imidazole) with SIGMAFAST™ Protease Inhibitor tablets (Sigma).  
260 Cells were lysed in three passages through an Avestin Emulsiflex C3 at 15,000 psi. Debris and  
261 unbroken cells were removed by centrifuging at 18,000 x g for 20m. ATP and MgCl<sub>2</sub> were added  
262 to lysate to a final concentration of 5 and 20 mM respectively, and lysate was bound to a HisTrap  
263 HP column (GE Life Sciences). Column was washed 3x with 10 Column Volumes (CV) of Wash  
264 Buffer [2.5 x PBS; 40 mM Imidazole] and eluted with 12 CV of Elution Buffer [2.5x PBS; 500  
265 mM Imidazole]. Eluted fractions were concentrated to 2 mL with 30 kDa cutoff concentrators  
266 (Amicon) and diluted 1:10 in IEX1 buffer [20mM Tris pH 8.0 (RT) ; 15mM NaCl]. ATP and  
267 MgCl<sub>2</sub> were then added to a final concentration of 1 and 20 mM and then applied to a HiTrap Q  
268 column (GE Life Sciences). Separation occurred over an 18 CV gradient from 100% IEX1 to



269 100% IEX2 buffers [20mM Tris pH 8.0 (RT) ; 500mM NaCl]. Peak fractions were concentrated  
270 with 30 kDa cutoff concentrators (Amicon) to ~10 mg/ml and loaded onto a S200 Increase  
271 10/300 GL (GE Life Sciences) in SEC Buffer [20mM Tris, pH 8.0 (RT); 100mM NaCl]. Peak  
272 fractions were pooled and concentrated, and aliquots were flash frozen and stored at -70°C.

273 **ATPase Assays** ATPase activity of EccA1 and EccA1 point mutants was measured with an  
274 ATPase/GTPase kit (Sigma) adapted for 384 well-plates. Experiments were conducted for 180  
275 minutes with a final EccA1 concentration of 1  $\mu$ M. For ebselen treatments, samples were  
276 incubated on ice with drug for 20 min prior to assay. Background activity was determined by  
277 conducting reactions in the absence of added ATP.

278 **Mass Spectrometry** Protein samples were alkylated with 10 mM iodoacetamide in the dark at  
279 37°C for 30m and subsequently digested with trypsin (Promega, 50 ng) overnight at 37°C.

280 Digested peptide mixtures were then acidified, partially dried down in a SpeedVac (Savant) and  
281 desalted using a home-made C18 (3M Empore) stage tip filled with 0.4 $\mu$ l of poros R3 (Applied  
282 Biosystems) resin. Bound peptides were eluted with 30-80% acetonitrile in 0.1% Trifluoroacetic  
283 acid and partially dried to prepare for LC-MS/MS. Liquid chromatography was performed on a  
284 fully automated Ultimate 3000 RSLC nano System (Thermo Scientific) fitted with a 100  $\mu$ m x 2  
285 cm PepMap100 C18 Nano Trap column and a 75  $\mu$ m x 25 cm reverse phase C18 nano column  
286 (Acclaim PepMap, Thermo Scientific). Samples were separated using a binary gradient consisting  
287 of buffer A (2% MeCN, 0.1% formic acid) and buffer B (80% MeCN, 0.1% formic acid), with a  
288 flow rate of 300 nL/min. The HPLC system was coupled to a Q Exactive Plus mass spectrometer  
289 (Thermo Scientific) equipped with a nanospray ion source. The mass spectrometer was operated  
290 in standard data dependent mode, performed MS full-scan at 350-1600 m/z range, with a  
291 resolution of 70000. This was followed by MS2 acquisitions of the 15 most intense ions with a

292 resolution of 17500 and NCE of 27%. MS target values of 1e6 and MS2 target values of 1e5  
293 were used. Isolation window of precursor was set at 1.5 Da and dynamic exclusion of sequenced  
294 peptides was enabled for 30s. The acquired MS/MS raw files were searched using Sequest  
295 (Proteome Discoverer v2.1) search engine. MS/MS spectra were searched against the *M.*  
296 *tuberculosis* EccA1 sequence including a contaminant database. A list of EccA1 peptides were  
297 selected from the result for Parallel Reaction Monitoring (PRM) experiment. For PRM, the mass  
298 spectrometer performed a MS full-scan at 400-1600 m/z range, with a resolution of 35000. This  
299 was followed by one MS2 acquisitions with a resolution of 35000. MS target values of 3e6 and  
300 MS2 target values of 5e5 were used. Isolation window of precursor was set at 0.7 Da.

301 **Generation of plasmids and mutants** Primers and plasmids are listed in Supplementary Tables  
302 1 and 3. *M. tuberculosis* EccA1 was amplified from the pRD1-2F9 cosmid (Kind gift from  
303 Roland Brosch, Institut Pasteur), and cloned into the pH3c-LIC backbone (PSI:Biolog-  
304 Materials Repository). EccA1 C204S and C204V point mutants were generated via site directed  
305 mutagenesis of the resulting pH3c-LIC EccA1 plasmid. To generate the pMOFXh  
306 complementation plasmid, a dsDNA fragment was designed with *ccdB* and *cam* genes flanked by  
307 SapI restriction sites and regions complementary to the 30 bp surrounding the HpaI and EcoRV  
308 sites in pMV306hsp. This fragment was then cloned into pMV306hsp digested with HpaI and  
309 EcoRV via *in vivo* Assembly[42]. EccA1, C204S, and C204V complementation constructs were  
310 cloned from the pH3c-LIC plasmid into pINIT\_kan, and were subsequently flipped into  
311 pMOFXh using FX cloning[43].

312

## 313 References

- 314 1. Pym AS, Brodin P, Brosch R, Huerre M, Cole ST. Loss of RD1 contributed to the  
315 attenuation of the live tuberculosis vaccines *Mycobacterium bovis* BCG and  
316 *Mycobacterium microti*. *Molecular Microbiology*. 2002;46: 709–717. doi:10.1046/j.1365-  
317 2958.2002.03237.x
- 318 2. Volkman HE, Clay H, Beery D, Chang JCW, Sherman DR, Ramakrishnan L. Tuberculous  
319 granuloma formation is enhanced by a mycobacterium virulence determinant. *PLoS*  
320 *biology*. 2004;2: e367. doi:10.1371/journal.pbio.0020367
- 321 3. Lewis KN, Liao R, Guinn KM, Hickey MJ, Smith S, Behr MA, et al. Deletion of RD1 from  
322 *Mycobacterium tuberculosis* Mimics Bacille Calmette–Guérin Attenuation. *The Journal of*  
323 *Infectious Diseases*. 2003;187: 117–123. doi:10.1086/345862
- 324 4. Behr MA, Wilson MA, Gill WP, Salamon H, Schoolnik GK, Rane S, et al. Comparative  
325 genomics of BCG vaccines by whole-genome DNA microarray. *Science (New York, NY)*.  
326 1999;284: 1520–3.
- 327 5. Mahairas GG, Sabo PJ, Hickey MJ, Singh DC, Stover CK. Molecular analysis of genetic  
328 differences between *Mycobacterium bovis* BCG and virulent *M. bovis*. *Journal of*  
329 *bacteriology*. 1996;178: 1274–82. doi:10.1128/jb.178.5.1274-1282.1996
- 330 6. Guinn KM, Hickey MJ, Mathur SK, Zakel KL, Grotzke JE, Lewinsohn DM, et al.  
331 Individual RD1-region genes are required for export of ESAT-6/CFP-10 and for virulence  
332 of *Mycobacterium tuberculosis*. *Molecular microbiology*. 2004;51: 359–70.  
333 doi:10.1046/j.1365-2958.2003.03844.x
- 334 7. van der Wel N, Hava D, Houben D, Fluitsma D, van Zon M, Pierson J, et al. *M.*  
335 *tuberculosis* and *M. leprae* translocate from the phagolysosome to the cytosol in myeloid  
336 cells. *Cell*. 2007;129: 1287–98. doi:10.1016/j.cell.2007.05.059
- 337 8. Simeone R, Bobard A, Lippmann J, Bitter W, Majlessi L, Brosch R, et al. Phagosomal  
338 rupture by *Mycobacterium tuberculosis* results in toxicity and host cell death. Ehrst S, editor.  
339 *PLoS pathogens*. 2012;8: e1002507. doi:10.1371/journal.ppat.1002507
- 340 9. Simeone R, Majlessi L, Enninga J, Brosch R. Perspectives on mycobacterial vacuole-to-  
341 cytosol translocation: the importance of cytosolic access. *Cellular Microbiology*. 2016;18:  
342 1070–1077. doi:10.1111/cmi.12622
- 343 10. Hsu T, Hingley-Wilson SM, Chen B, Chen M, Dai AZ, Morin PM, et al. The primary  
344 mechanism of attenuation of bacillus Calmette-Guerin is a loss of secreted lytic function  
345 required for invasion of lung interstitial tissue. *Proceedings of the National Academy of*  
346 *Sciences of the United States of America*. 2003;100: 12420–5.  
347 doi:10.1073/pnas.1635213100

- 348 11. King CH, Mundayoor S, Crawford JT, Shinnick TM. Expression of contact-dependent  
349 cytolytic activity by *Mycobacterium tuberculosis* and isolation of the genomic locus that  
350 encodes the activity. *Infection and Immunity*. 1993;61: 2708–2712.
- 351 12. Smith J, Manoranjan J, Pan M, Bohsali A, Xu J, Liu J, et al. Evidence for Pore Formation  
352 in Host Cell Membranes by ESX-1-Secreted ESAT-6 and Its Role in *Mycobacterium*  
353 *marinum* Escape from the Vacuole. *Infection and Immunity*. 2008;76: 5478–5487.  
354 doi:10.1128/IAI.00614-08
- 355 13. Gao L-Y, Guo S, McLaughlin B, Morisaki H, Engel JN, Brown EJ. A mycobacterial  
356 virulence gene cluster extending RD1 is required for cytolysis, bacterial spreading and  
357 ESAT-6 secretion. *Molecular microbiology*. 2004;53: 1677–93. doi:10.1111/j.1365-  
358 2958.2004.04261.x
- 359 14. de Jonge MI, Pehau-Arnaudet G, Fretz MM, Romain F, Bottai D, Brodin P, et al. ESAT-6  
360 from *Mycobacterium tuberculosis* Dissociates from Its Putative Chaperone CFP-10 under  
361 Acidic Conditions and Exhibits Membrane-Lysing Activity. *J Bacteriol*. 2007;189: 6028–  
362 6034. doi:10.1128/JB.00469-07
- 363 15. Conrad WH, Osman MM, Shanahan JK, Chu F, Takaki KK, Cameron J, et al.  
364 Mycobacterial ESX-1 secretion system mediates host cell lysis through bacterium contact-  
365 dependent gross membrane disruptions. *Proceedings of the National Academy of Sciences*  
366 *of the United States of America*. 2017;114: 1371–1376. doi:10.1073/pnas.1620133114
- 367 16. Lu J, Vlamis-Gardikas A, Kandasamy K, Zhao R, Gustafsson TN, Engstrand L, et al.  
368 Inhibition of bacterial thioredoxin reductase: an antibiotic mechanism targeting bacteria  
369 lacking glutathione. *The FASEB Journal*. 2013;27: 1394–1403. doi:10.1096/fj.12-223305
- 370 17. Xu K, Zhang Y, Tang B, Laskin J, Roach PJ, Chen H. Study of Highly Selective and  
371 Efficient Thiol Derivatization Using Selenium Reagents by Mass Spectrometry. *Anal*  
372 *Chem*. 2010;82: 6926–6932. doi:10.1021/ac1011602
- 373 18. Azad GK, Tomar RS. Ebselen, a promising antioxidant drug: mechanisms of action and  
374 targets of biological pathways. *Molecular biology reports*. 2014;41: 4865–79.  
375 doi:10.1007/s11033-014-3417-x
- 376 19. Chan G, Hardej D, Santoro M, Lau Cam C, Billack B. Evaluation of the antimicrobial  
377 activity of ebselen: Role of the yeast plasma membrane H<sup>+</sup>-ATPase. *Journal of*  
378 *Biochemical and Molecular Toxicology*. 2007;21: 252–264. doi:10.1002/jbt.20189
- 379 20. Stanley S a, Raghavan S, Hwang WW, Cox JS. Acute infection and macrophage subversion  
380 by *Mycobacterium tuberculosis* require a specialized secretion system. *Proceedings of the*  
381 *National Academy of Sciences*. 2003;100: 13001–13006. doi:10.1073/pnas.2235593100
- 382 21. Bitter W, Houben ENG, Bottai D, Brodin P, Brown EJ, Cox JS, et al. Systematic genetic  
383 nomenclature for type VII secretion systems. *PLoS pathogens*. 2009;5: e1000507.  
384 doi:10.1371/journal.ppat.1000507

- 385 22. Rosenberg OSS, Dovala D, Li X, Connolly L, Bendebury A, Finer-Moore J, et al.  
386 Substrates Control Multimerization and Activation of the Multi-Domain ATPase Motor of  
387 Type VII Secretion. *Cell*. 2015; 1–12. doi:10.1016/j.cell.2015.03.040
- 388 23. Brodin P, Majlessi L, Marsollier L, de Jonge MI, Bottai D, Demangel C, et al. Dissection of  
389 ESAT-6 System 1 of *Mycobacterium tuberculosis* and Impact on Immunogenicity and  
390 Virulence. *Infection and Immunity*. 2006;74: 88–98. doi:10.1128/IAI.74.1.88-98.2006
- 391 24. Champion MM, Williams EA, Pinapati RS, Champion PAD. Correlation of Phenotypic  
392 Profiles Using Targeted Proteomics Identifies Mycobacterial Esx-1 Substrates. *Journal of*  
393 *proteome research*. 2014;13: 5151–5164. doi:10.1021/pr500484w
- 394 25. Luthra A, Mahmood A, Arora A, Ramachandran R. Characterization of Rv3868, an  
395 Essential Hypothetical Protein of the ESX-1 Secretion System in *Mycobacterium*  
396 *tuberculosis*. *J Biol Chem*. 2008;283: 36532–36541. doi:10.1074/jbc.M807144200
- 397 26. Wagner JM, Evans TJ, Korotkov KV. Crystal structure of the N-terminal domain of EccA1  
398 ATPase from the ESX-1 secretion system of *Mycobacterium tuberculosis*. *Proteins:*  
399 *Structure, Function and Bioinformatics*. 2014;82: 159–163. doi:10.1002/prot.24351
- 400 27. Jia J, Abudu YP, Claude-Taupin A, Gu Y, Kumar S, Choi SW, et al. Galectins Control  
401 mTOR in Response to Endomembrane Damage. *Molecular Cell*. 2018;70: 120-135.e8.  
402 doi:10.1016/j.molcel.2018.03.009
- 403 28. Osman MM, Pagán AJ, Shanahan JK, Ramakrishnan L. *Mycobacterium marinum*  
404 phthiocerol dimycocerosates enhance macrophage phagosomal permeabilization and  
405 membrane damage. *PLOS ONE*. 2020;15: e0233252. doi:10.1371/journal.pone.0233252
- 406 29. Sampson SL, Dascher CC, Sambandamurthy VK, Russell RG, Jacobs WR, Bloom BR, et  
407 al. Protection elicited by a double leucine and pantothenate auxotroph of *Mycobacterium*  
408 *tuberculosis* in guinea pigs. *Infection and immunity*. 2004;72: 3031–7.  
409 doi:10.1128/IAI.72.5.3031-3037.2004
- 410 30. Favrot L, Grzegorzewicz AE, Lajiness DH, Marvin RK, Boucau J, Isailovic D, et al.  
411 Mechanism of inhibition of *Mycobacterium tuberculosis* antigen 85 by ebselen. *Nature*  
412 *Communications*. 2013;4: 1–10. doi:10.1038/ncomms3748
- 413 31. Gustafsson TN, Osman H, Werngren J, Hoffner S, Engman L, Holmgren A. Ebselen and  
414 analogs as inhibitors of *Bacillus anthracis* thioredoxin reductase and bactericidal  
415 antibacterials targeting *Bacillus* species, *Staphylococcus aureus* and *Mycobacterium*  
416 *tuberculosis*. *Biochimica et Biophysica Acta - General Subjects*. 2016;1860: 1265–1271.  
417 doi:10.1016/j.bbagen.2016.03.013
- 418 32. Johnson BK, Colvin CJ, Needle DB, Mba Medie F, Champion PADD, Abramovitch RB.  
419 The Carbonic Anhydrase Inhibitor Ethoxzolamide Inhibits the *Mycobacterium tuberculosis*  
420 PhoPR Regulon and Esx-1 Secretion and Attenuates Virulence. *Antimicrobial agents and*  
421 *chemotherapy*. 2015;59: 4436–45. doi:10.1128/AAC.00719-15

- 422 33. Rybniker J, Chen JM, Sala C, Hartkoorn RC, Vocat A, Benjak A, et al. Anticytolytic  
423 Screen Identifies Inhibitors of Mycobacterial Virulence Protein Secretion. *Cell Host &*  
424 *Microbe*. 2014;16: 538–548. doi:10.1016/j.chom.2014.09.008
- 425 34. Zhang X, Wigley DB. The “glutamate switch” provides a link between ATPase activity and  
426 ligand binding in AAA+ proteins. *Nature Structural & Molecular Biology*. 2008;15: 1223.  
427 doi:10.1038/nsmb.1501
- 428 35. Kil J, Lobarinas E, Spankovich C, Griffiths SK, Antonelli PJ, Lynch ED, et al. Safety and  
429 efficacy of ebselen for the prevention of noise-induced hearing loss: A randomised, double-  
430 blind, placebo-controlled, phase 2 trial. *The Lancet*. 2017;390: 969–979.  
431 doi:10.1016/S0140-6736(17)31791-9
- 432 36. Yamaguchi T, Sano K, Takakura K, Saito I, Shinohara Y, Asano T, et al. Ebselen in acute  
433 ischemic stroke: a placebo-controlled, double-blind clinical trial. Ebselen Study Group.  
434 *Stroke*. 1998;29: 12–7.
- 435 37. Singh N, Halliday AC, Thomas JM, Kuznetsova OV, Baldwin R, Woon ECY, et al. A safe  
436 lithium mimetic for bipolar disorder. *Nature Communications*. 2013;4: 1332.  
437 doi:10.1038/ncomms2320
- 438 38. Terentis AC, Freewan M, Sempértegui Plaza TS, Raftery MJ, Stocker R, Thomas SR. The  
439 selenazal drug ebselen potently inhibits indoleamine 2,3-dioxygenase by targeting enzyme  
440 cysteine residues. *Biochemistry*. 2010;49: 591–600. doi:10.1021/bi901546e
- 441 39. Lu J, Vlamis-Gardikas A, Kandasamy K, Zhao R, Gustafsson TN, Engstrand L, et al.  
442 Inhibition of bacterial thioredoxin reductase: an antibiotic mechanism targeting bacteria  
443 lacking glutathione. *The FASEB Journal*. 2012;27: 1394–1403. doi:10.1096/fj.12-223305
- 444 40. Gu R, Longenecker RJ, Homan J, Kil J. Ebselen attenuates tobramycin-induced ototoxicity  
445 in mice. *Journal of Cystic Fibrosis*. 2021;20: 271–277. doi:10.1016/j.jcf.2020.02.014
- 446 41. Seddon JA, Godfrey-Faussett P, Jacobs K, Ebrahim A, Hesselning AC, Schaaf HS. Hearing  
447 loss in patients on treatment for drug-resistant tuberculosis. *European Respiratory Journal*.  
448 2012;40: 1277–1286. doi:10.1183/09031936.00044812
- 449 42. García-Nafría J, Watson JF, Greger IH. IVA cloning: A single-tube universal cloning  
450 system exploiting bacterial In Vivo Assembly. *Scientific reports*. 2016;6: 27459.  
451 doi:10.1038/srep27459
- 452 43. Geertsma ER. FX Cloning: A Simple and Robust High-Throughput Cloning Method for  
453 Protein Expression. In: Valla S, Lale R, editors. *DNA Cloning and Assembly Methods*.  
454 Totowa, NJ: Humana Press; 2014. pp. 153–164. doi:10.1007/978-1-62703-764-8\_11

455



456 **Figure Legends**

457 **Figure 1: Ebselen treatment inhibits ESX-1 Mediated Membrane Disruption & Secretion.**

458 **A:** Percent sRBC hemolysis by *M. marinum* relative to DMSO treatment in the presence of  
459 increasing concentrations of antioxidants. Data are presented in biological triplicate. **B:**  
460 Structures of ebselen and analogue 2-(2,6-dimethylphenyl)-1-isoindolinone (DIME) **C:** Colony  
461 forming units of *M. marinum* following 4 hours of exposure to 62.5  $\mu$ M Ebselen or 0.5% DMSO.  
462 Data representative of 3 independent experiments. Student's t-test. **D:** Percent maximum  
463 hemolysis by wildtype *M. marinum* in response to ebselen or DIME treatment. Data presented in  
464 biological triplicate **E:** Western blot of lysed *M. marinum* cell pellet and culture filtrate fractions  
465 after 4 hours incubation with 32  $\mu$ M ebselen, DIME, or 0.5 %DMSO. anti-ESAT-6; anti-CFP-10  
466 and anti-GroEL2 (loading control). Blot is representative of 3 independent experiments. All error  
467 bars represent SEM.

468

469 **Figure 2: Ebselen inhibits EccA1 through covalent modification of Cys204 and Cys531. A:**  
470 Dose-response curve of EccA1 treated with ebselen. ATPase activity is normalized to EccA1  
471 treated with DMSO. Data are biological triplicate. Error bars show SEM. **B:** Qualitative  
472 representation of ebselen modified peptides containing Cys204 and Cys531 detected by MS at  
473 increasing concentrations of ebselen. + symbols indicate concentrations at which ebselen  
474 modified peptides were observed. **C:** Model of Cys204 of EccA1 (PDB accession code 4F3V)  
475 and residues located within 5 angstroms, with dashes measuring distance. **D:** ATPase activity of  
476 EccA1 C204V point mutant (C204V) vs wildtype EccA1 (WT). Activity normalized to WT.  
477 Data from two independent experiments. ATPase activity is normalized to wildtype. Student's t-  
478 test. **E:** ATPase activity of EccA1 C204S point mutant (C204S) compared to wildtype EccA1  
479 (WT). ATPase activity is normalized to wildtype. Data from five independent experiments.  
480 Student's t-test. **F:** Relative ATPase activity of EccA1 C204V and wildtype EccA1 (WT) treated  
481 with 8  $\mu$ M ebselen. ATPase activity is normalized to DMSO treatment for each protein. Data  
482 from three independent experiments. Student's t-test. Error bars show SEM, p values are  
483 indicated.

484  
485 **Figure 3: EccA1's role in ESAT-6 secretion does not correlate with its in vitro ATPase**  
486 **activity. A:** Immunoblots of Mm cell lysate (left) and culture filtrate (right) fractions. anti-  
487 GroEL2 (loading control) **B:** Fractions of Mm treated with 0.5% DMSO or 32  $\mu$ M ebselen for 4  
488 hours. **C:** Fractions of Mm & Mm mutants after 48hours of growth in Sauton's Medium. GroEL2  
489 is used as a loading control.

490  
491  
492



493 **Figure 4: Ebselen inhibits Mm ESX-1 function in macrophages. A:** % of Mm-infected THP-1  
494 macrophages with galectin-8 puncta. DMSO – wildtype Mm treated with 0.5% DMSO. Ebselen  
495 – 16  $\mu$ M Ebselen. Data representative of three independent experiments. **B:** : Intramacrophage  
496 growth of ebselen-treated Mm within J774A.1 cells as measured by bacterial fluorescence. Doses  
497 shown in legend. Data representative of three independent experiments.

498  
499 **Figure 5: Ebselen inhibits ESX-1 function in *M. tuberculosis*. A:** Western blots of lysed *M.*  
500 *tuberculosis* cell pellet and culture filtrate fractions after 96 hours. Blot representative of three  
501 independent experiments. **B:** % of Mtb-infected THP-1 macrophages with galectin-8 puncta.  
502 Labels correspond to treatment with 0.5% DMSO, 8  $\mu$ M Ebselen, or 16  $\mu$ M Ebselen. Data  
503 representative of three independent experiments.

504

505 **Figure S1: Mass spectrometry reveals peptides confirming ebselen modification of Cys204**  
506 **and Cys531. A and B:** MS/MS spectra of ebselen bound Cys204 and Cys531 generated from  
507 EccA1 treated with 8  $\mu$ M ebselen. Fragmentation map is included in the top right corner. Spectra  
508 are scaled for readability, unscaled are inset. Masses of different b/y ions are displayed. y-ions  
509 include mass of ebselen, unless otherwise stated. Ionized ebselen is visible at 275.992 m/z, as  
510 some ebselen-cysteine bonds are broken during peptide fragmentation. As a result, fragments are  
511 observed with (cyan) and without (red) bound ebselen, separated by ebselen's nominal mass  
512 (275).

513

514 **Figure S2: Cys 204 is conserved between *M. tuberculosis* and *M. marinum*.** **A:** Diagram of *M.*  
515 *tuberculosis* EccA1's N-terminal TPR domain including  $\beta$ -finger insertion, and its C-terminal  
516 AAA+ ATPase domain. Redrawn from [26]. **B:** Clustal Omega multiple sequence alignment of  
517 EccA1 homologs with Cys204 and Cys531 annotated. \* indicates positions with fully conserved  
518 residues. (:) indicates conservation between groups of strongly similar properties ( $> 0.5$  in Gonnet  
519 PAM 250 matrix). (.) indicates conservation between groups of weakly similar properties ( $\leq 0.5$   
520 Gonnet PAM 250 matrix)  
521

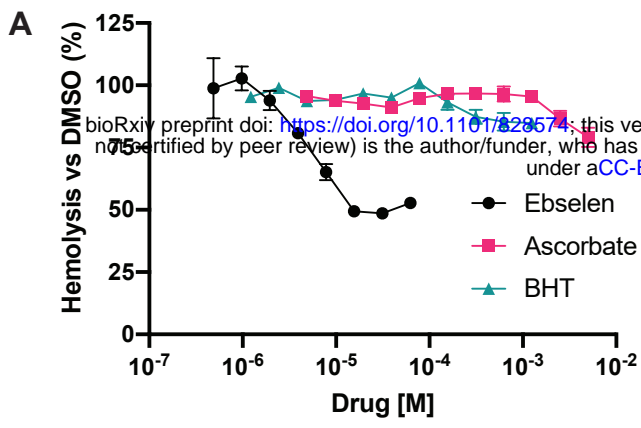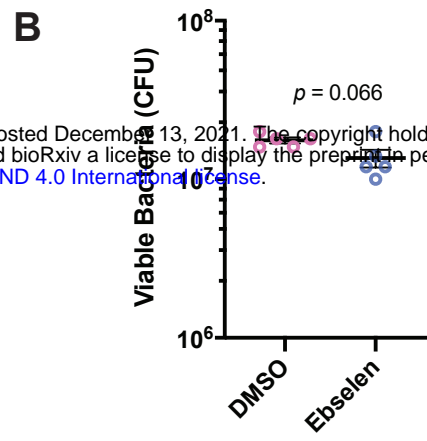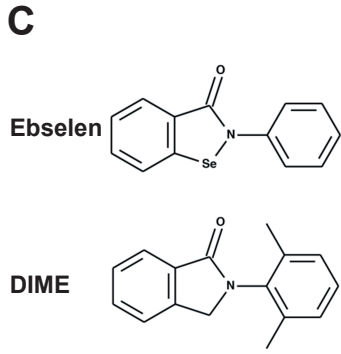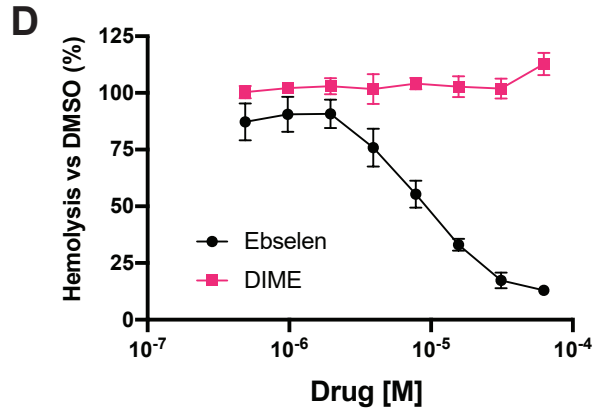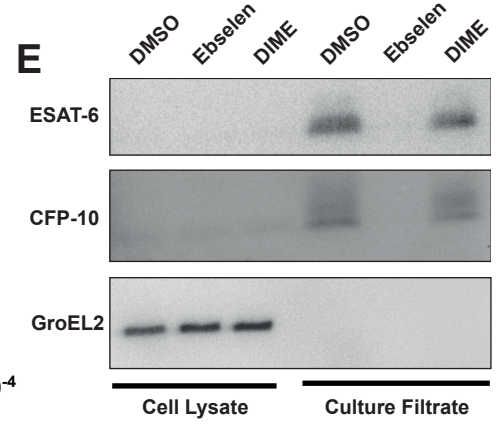

**A**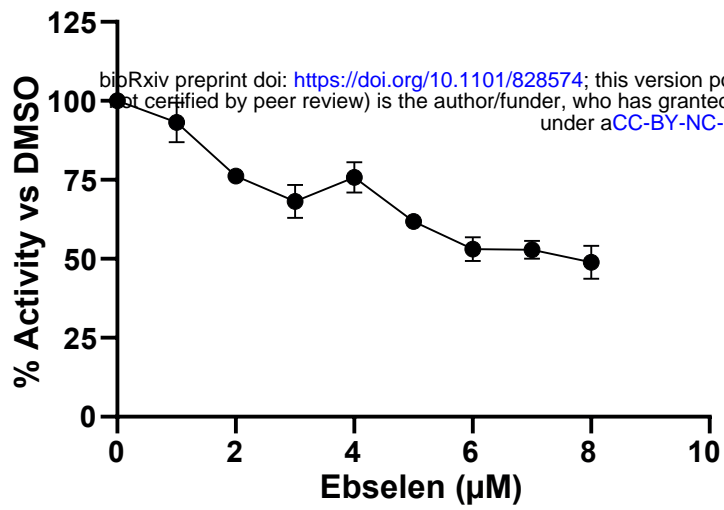**B**

| Cysteine | Peptide                  | [EbSelen] μM |   |   |   |   |   |   |   |   |
|----------|--------------------------|--------------|---|---|---|---|---|---|---|---|
|          |                          | 0            | 1 | 2 | 3 | 4 | 5 | 6 | 7 | 8 |
| 204      | LTEANDSPAGEA <b>C</b> AR | -            | + | + | + | + | + | + | + | + |
| 531      | QLVEASE <b>Q</b> CR      | -            | - | - | - | + | + | + | + | + |

**C**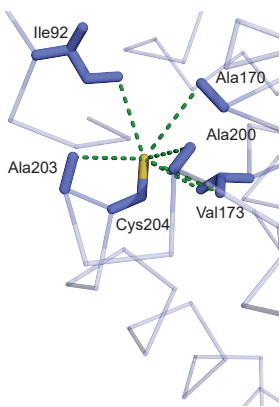**D**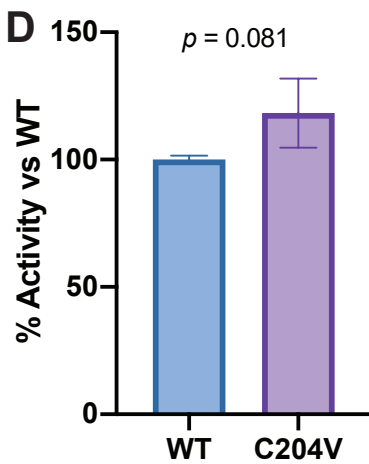**E**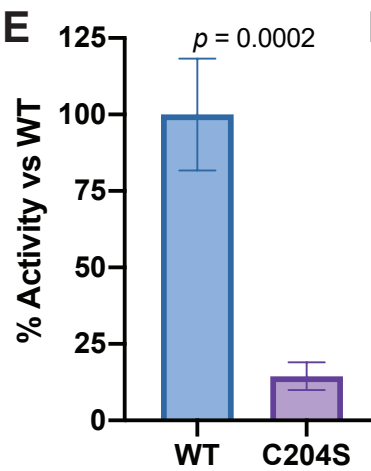**F**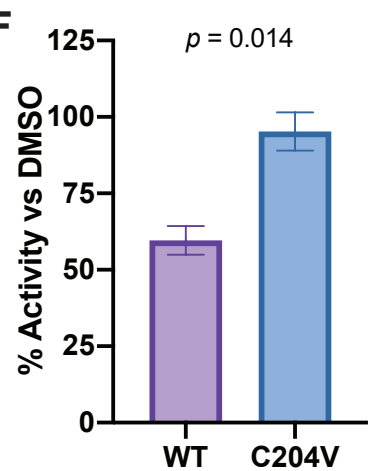

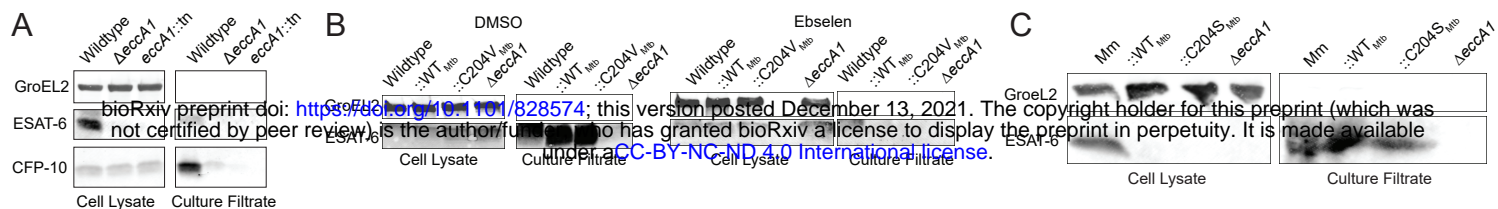

A

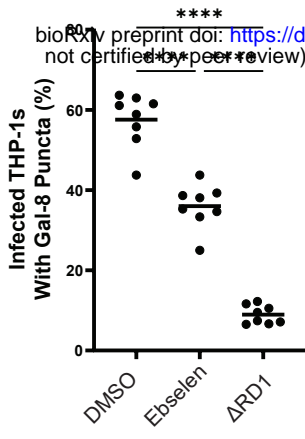

B

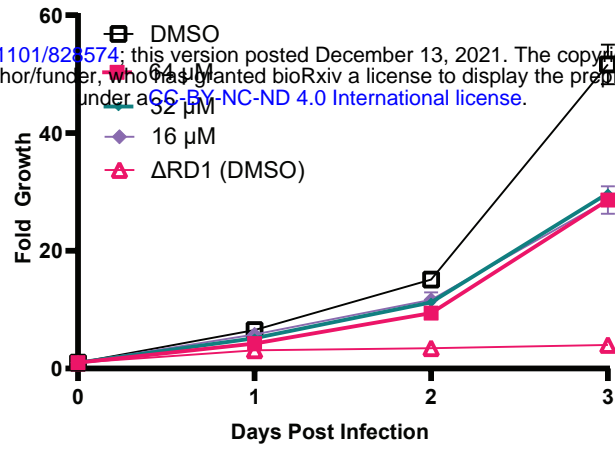

A

bioRxiv preprint doi: <https://doi.org/10.1101/828574>; this version posted December 13, 2021. The copyright holder for this preprint (which was not certified by peer review) is the author/funder, who has granted bioRxiv a license to display the preprint in perpetuity. It is made available under a [CC-BY-NC-ND 4.0 International license](https://creativecommons.org/licenses/by-nc-nd/4.0/).

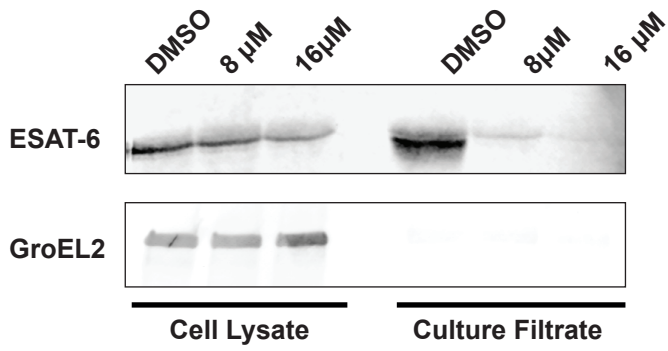

B

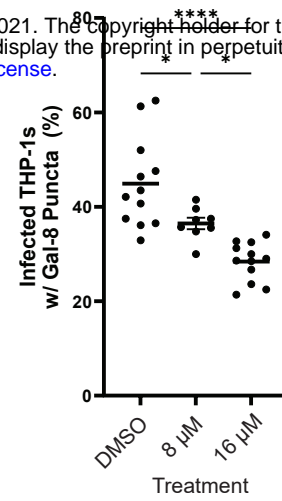

**A****Cys204 + Ebselen**

bioRxiv preprint doi: <https://doi.org/10.1101/828574>; this version posted December 13, 2021. The copyright holder for this preprint (which was not certified by peer review) is the author/funder, who has granted bioRxiv a license to display the preprint in perpetuity. It is made available under aCC-BY-NC-ND 4.0 International license.

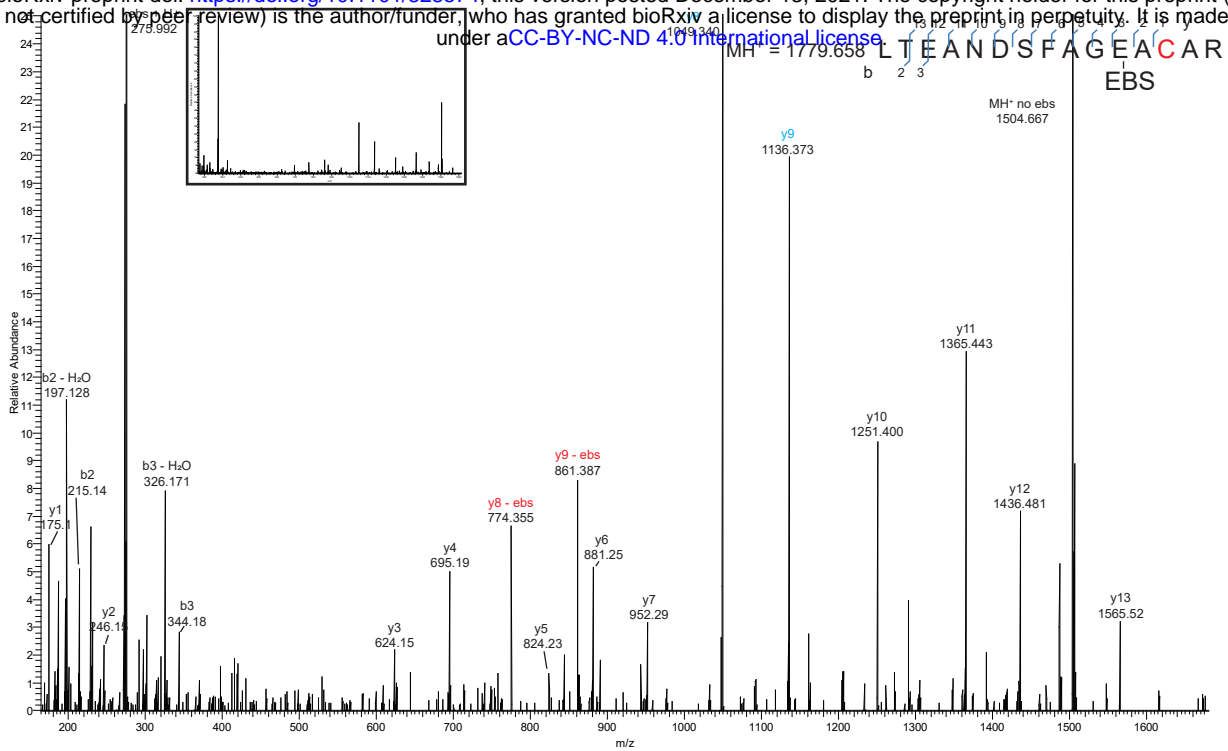**B****Cys531 + Ebselen**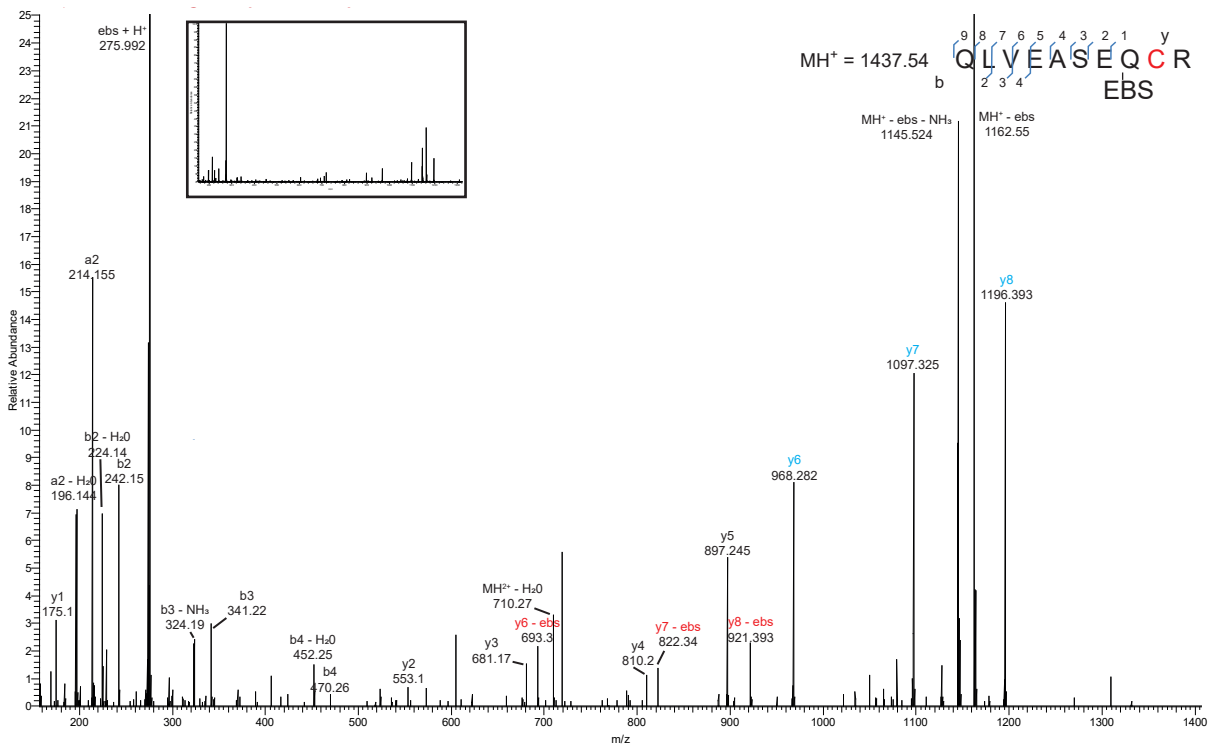



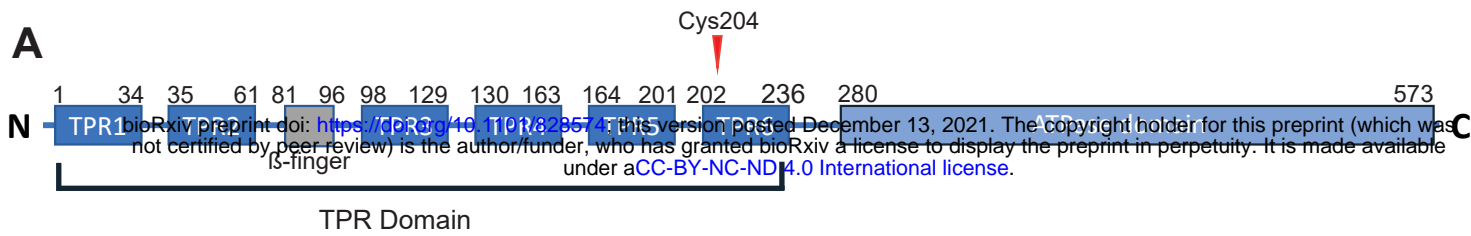

**B**

Cys204

|                        |                                                              |     |
|------------------------|--------------------------------------------------------------|-----|
| <i>M. tuberculosis</i> | ANLALFTEAERRLTEANDSPAGEACARAIAWYLAMARRSQGNESAVALLEWLQTTHPEP  | 239 |
| <i>M. marinum</i>      | ASLGLFTEAERRLTEANDSPAGEACAQIAWYLAMARRGAGNEEAVALLEWLQTTHPAP   | 239 |
| <i>M. kansasii</i>     | ANLGLFTEAERRLTEANDSPAGEACARAIAWYLAMARRSQGNEDAAVALLEWLQTTHPNP | 239 |
| <i>M. leprae</i>       | ANLGLFTEAERRLTEANDSPAGEACARSIWYLAMARRSQGNEDAAVALLEWLQTTHPES  | 239 |
| <i>M. smegmatis</i>    | ANLGLFTEADRRLTEANDTPVAQACAPVIAWYLAMARRSQGNESAQVLEWLQANFPEP   | 240 |
|                        | *.*.*****:*****:*..:*** *****.***.:* .*****:..*              |     |

  

Cys531

|                        |                                                               |     |
|------------------------|---------------------------------------------------------------|-----|
| <i>M. tuberculosis</i> | AADDSTLSTAAAEFLQAAKQLEQRMLRGRRALDVAGNGRYARQLVEASEQCRDMRLAQV   | 539 |
| <i>M. marinum</i>      | AGNDSTLSTAAADELLQAAKTLHERTLRGRPALDIAGNGRYARQLVEASEQYRDMRLAQQ  | 539 |
| <i>M. kansasii</i>     | TANDSTLSAEAADEFLLRAAKMLHERTLRGRPALDIAGNGRYARQLVEAAEQYRDMRLAQQ | 539 |
| <i>M. leprae</i>       | TDADSSLSAEASKNLLEAAKQLAQRTLRGRPALDVAGNGRYARQLVEAAEQCRDMRLARG  | 539 |
| <i>M. smegmatis</i>    | TANDSRLDDTAAKRVLEAATTLRSLNGKPALDIAGNGRYARQLVEAGEQNRDMRLARS    | 540 |
|                        | : ** * *:...*.**.*:**.*:***:*****.*** *****:                  |     |
